# Supplementary material
Source: PubMed Central journal article supplement (PMC1891210)

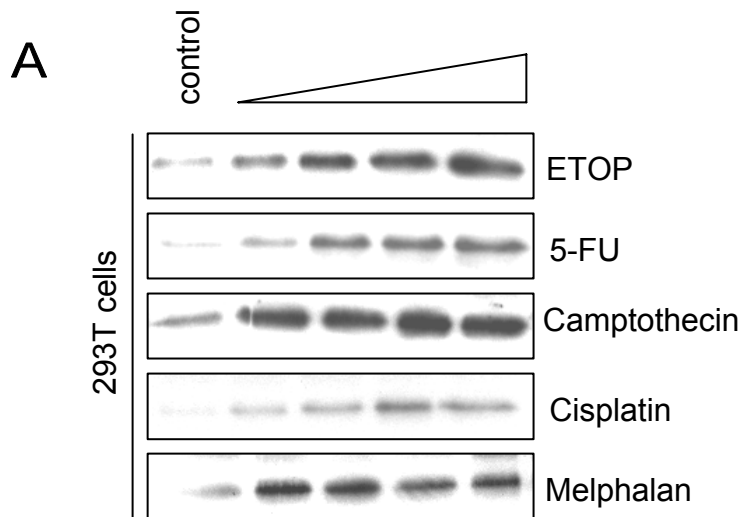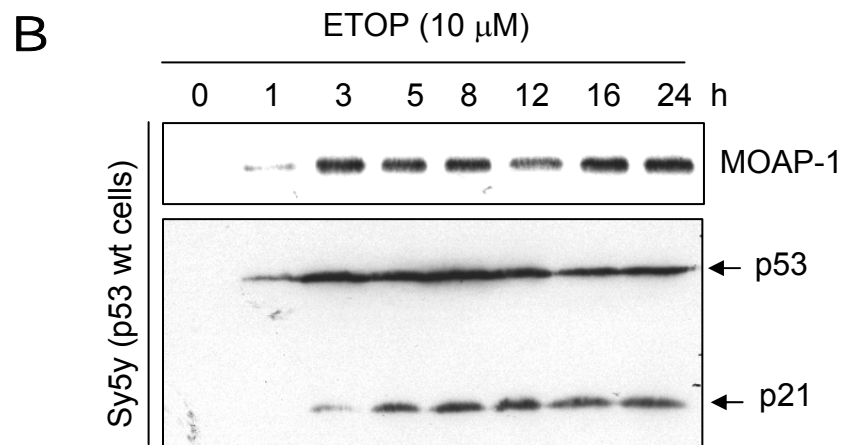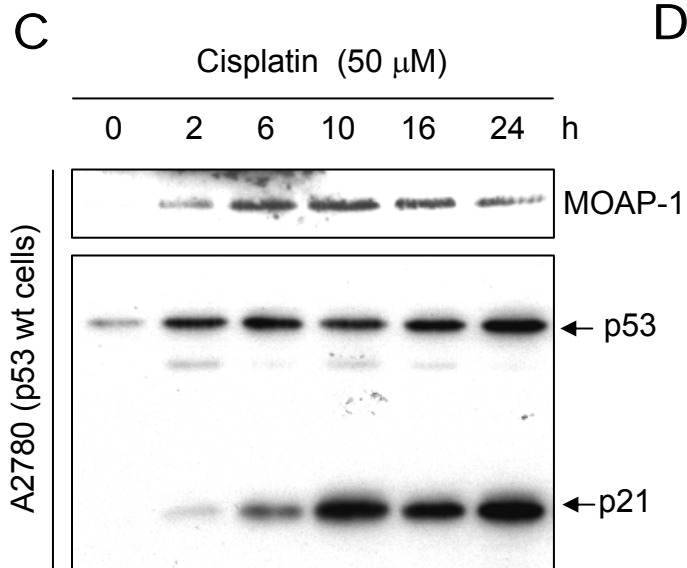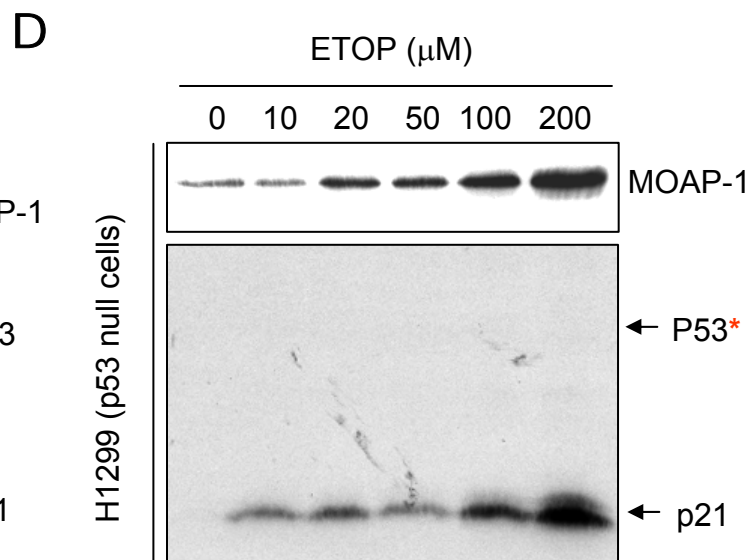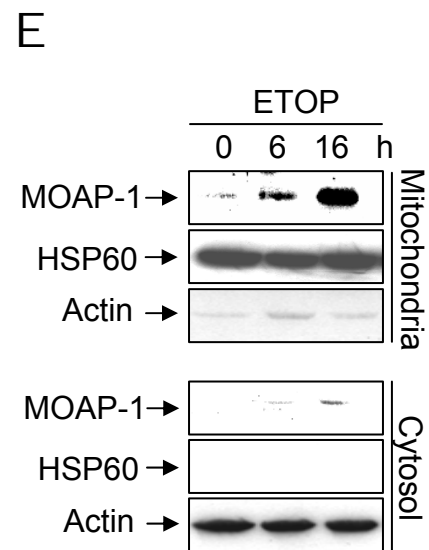

Supplement: pnas_0700007104_1.pdf [file pnas_0700007104_1.pdf]

**A**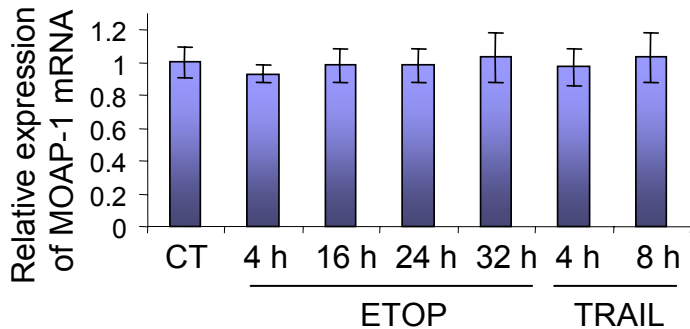**B**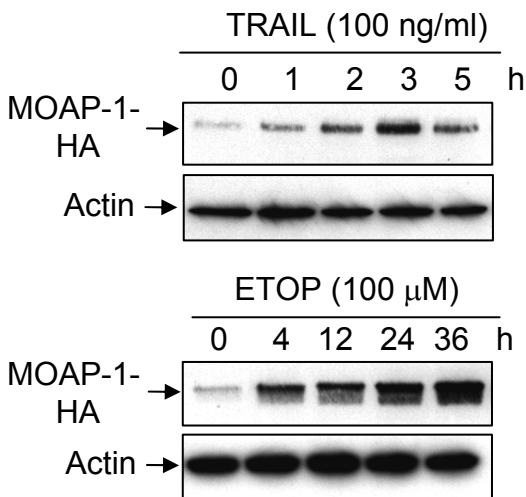

Supplement: pnas_0700007104_2.pdf [file pnas_0700007104_2.pdf]

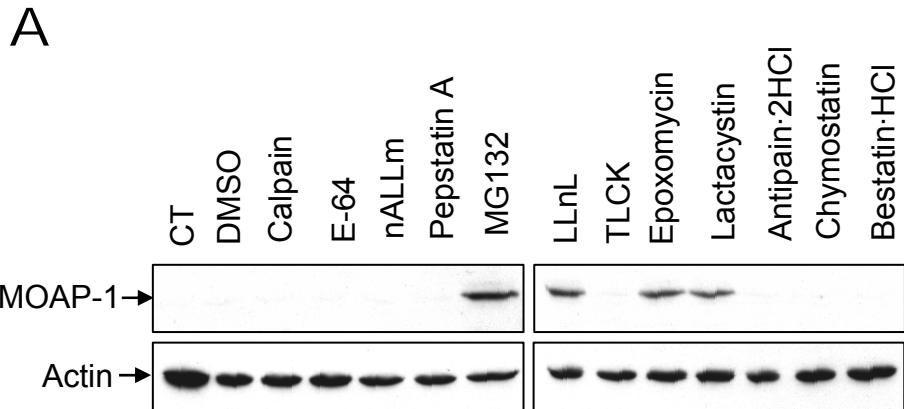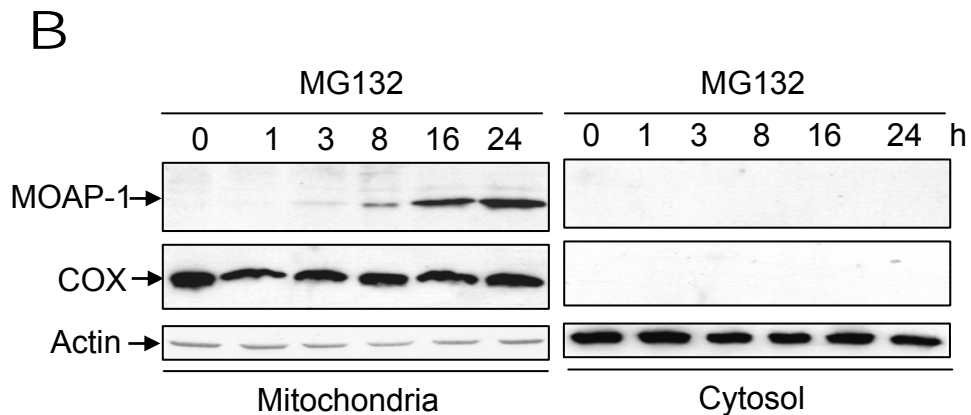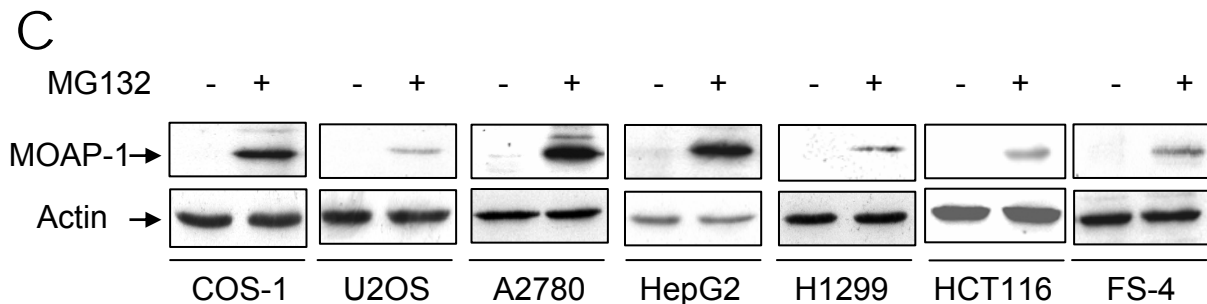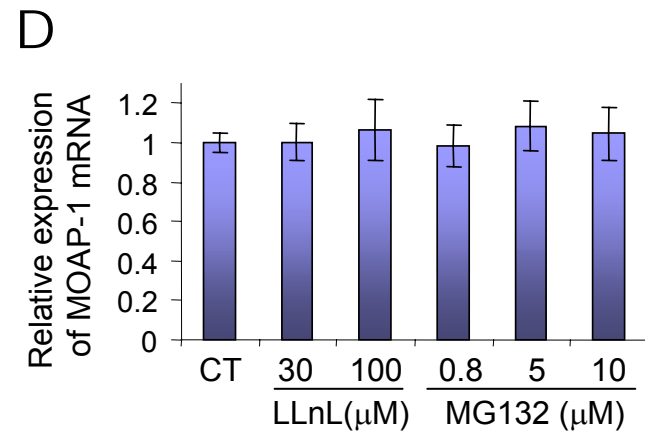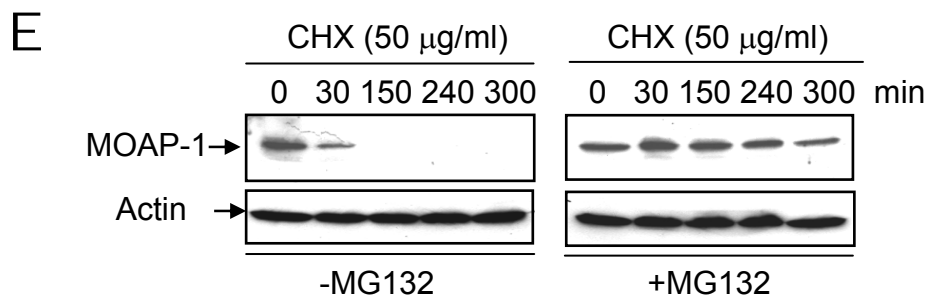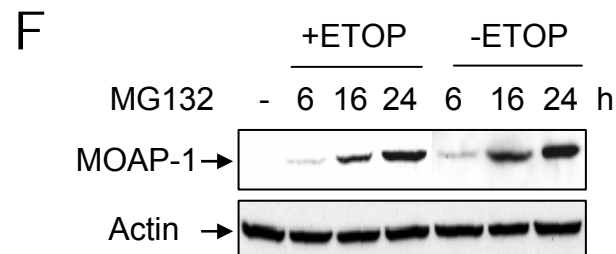

Supplement: pnas_0700007104_4.pdf [file pnas_0700007104_4.pdf]

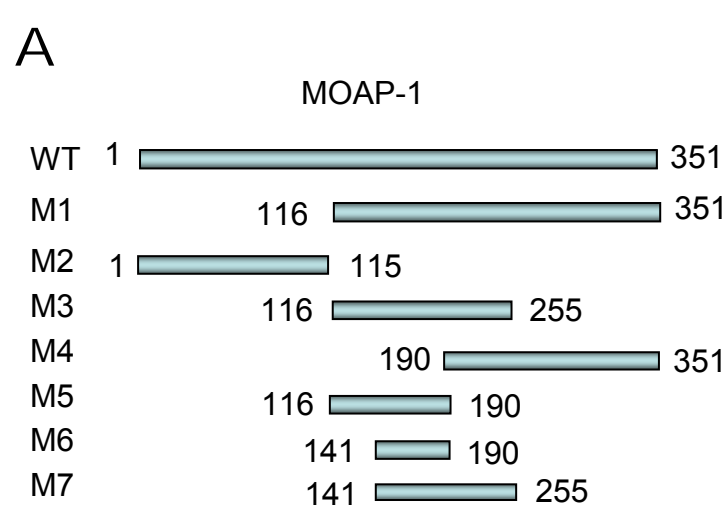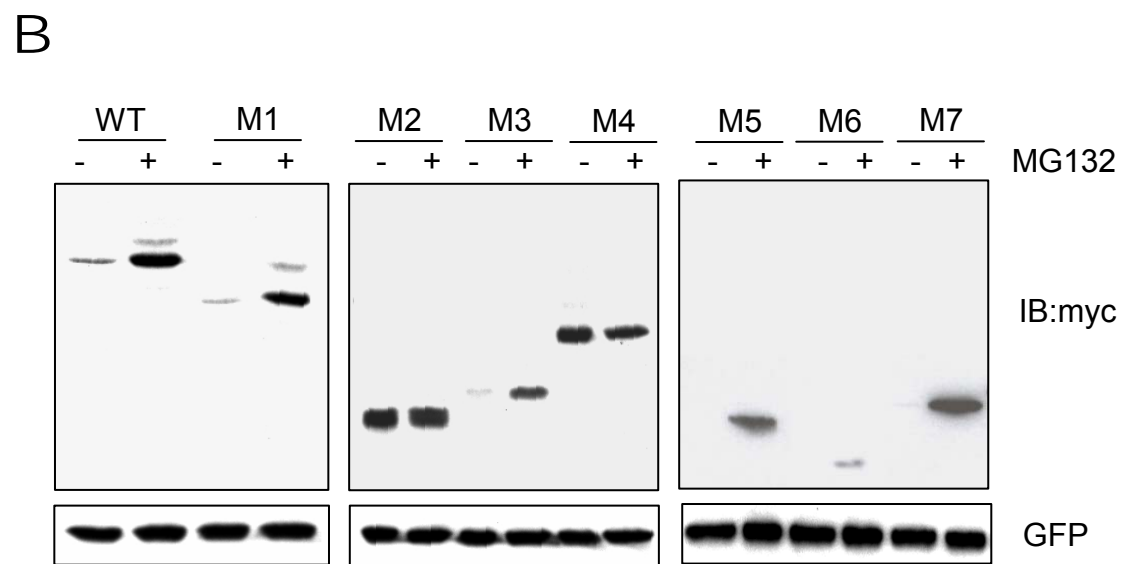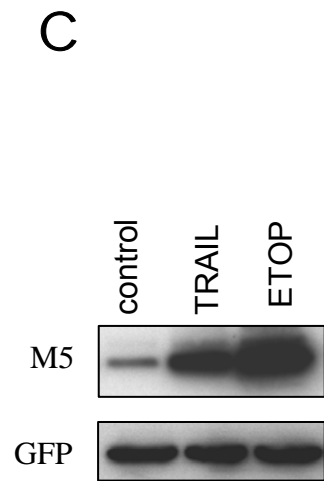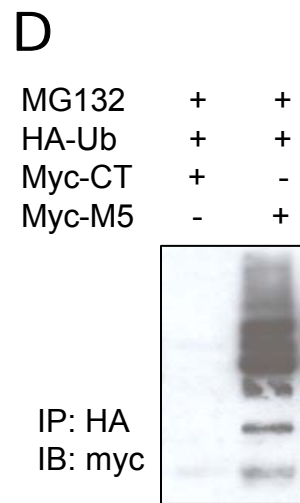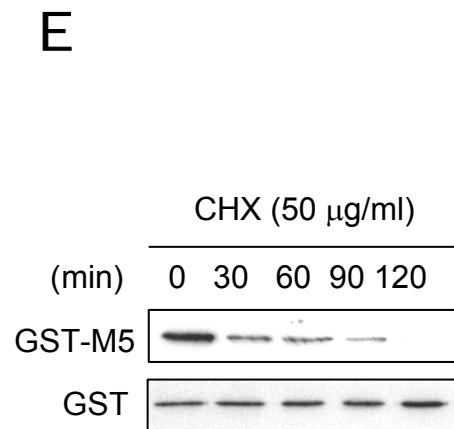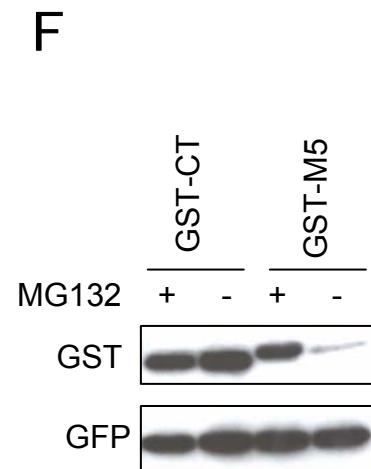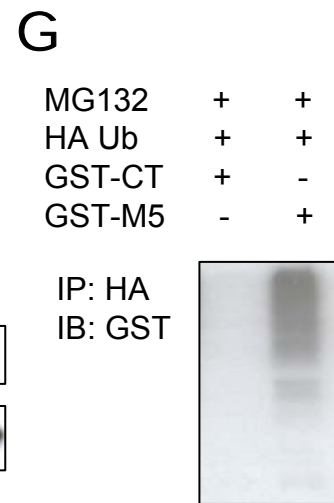

Supplement: pnas_0700007104_5.pdf [file pnas_0700007104_5.pdf]

**A**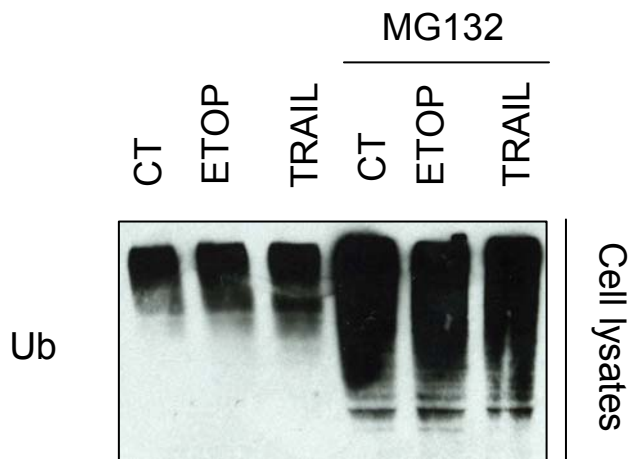**B**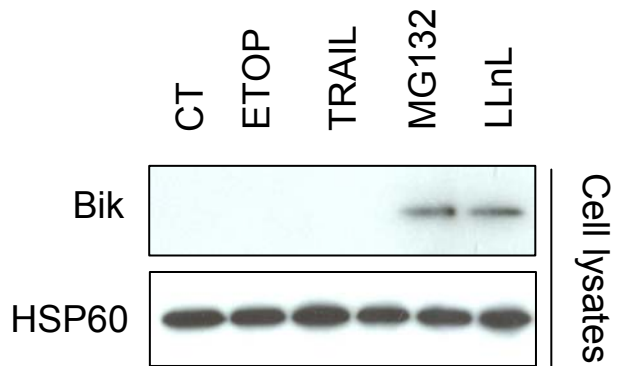**C**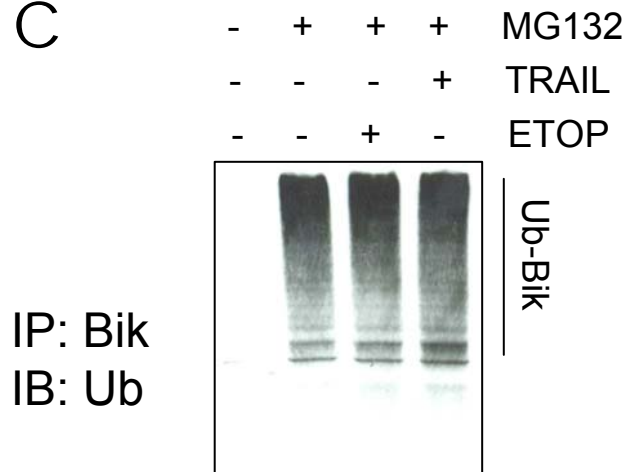

Supplement: pnas_0700007104_6.pdf [file pnas_0700007104_6.pdf]

A

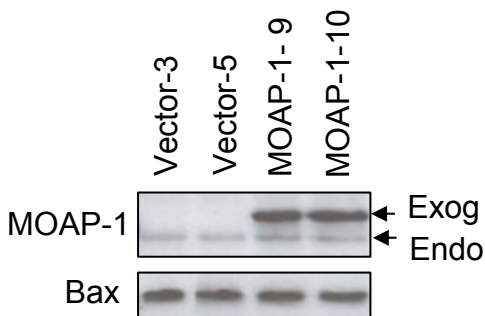

B

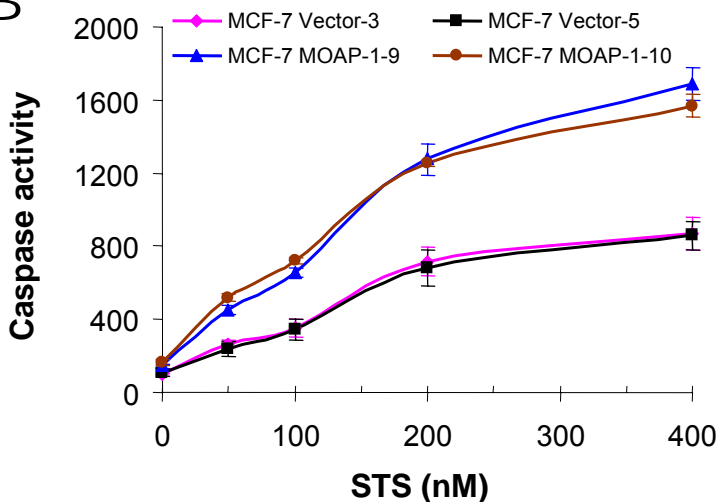

C

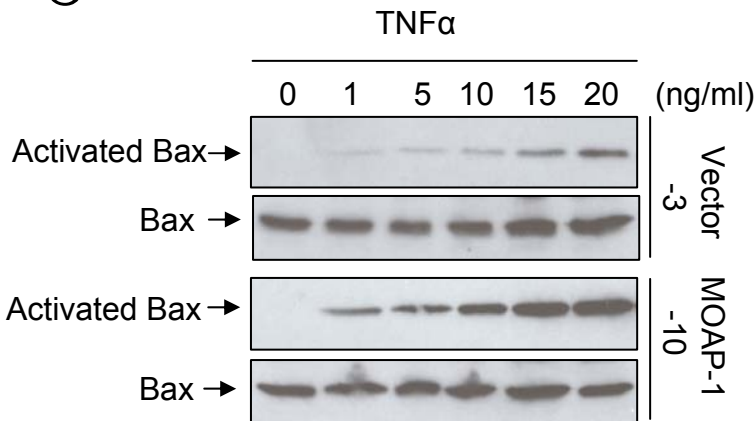

Supplement: pnas_0700007104_7.pdf [file pnas_0700007104_7.pdf]
